# Supplementary material
Source: Springer Nature journal article supplement (https://www.springermedizin.de/resource/supplementary/12875_2014_1093_MOESM2_ESM.pdf/9435788)

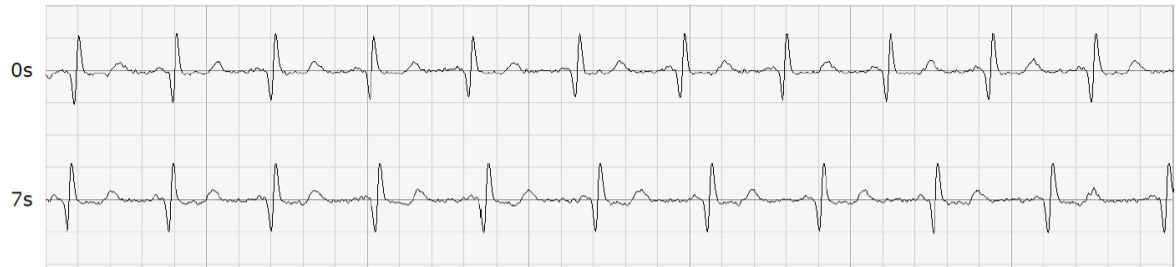

**Sinus rhythm**

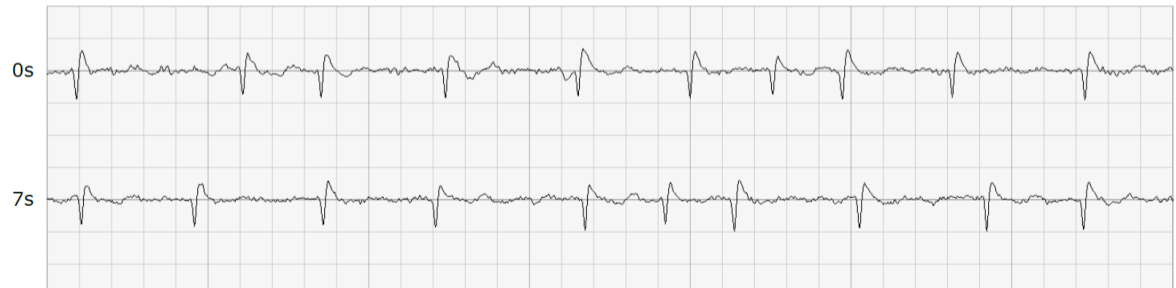

**Atrial fibrillation**

Supplement: MOESM2 [file 9435788]
